# Supplementary material
Source: PubMed Central journal article supplement (PMC7780042)
Supplement: mmc1.pdf [file mmc1.pdf]

**Supplement I - Gene Listings**

Seven genomic putative ORF translated databases were scored using the SM<sup>2</sup> methodology described. The databases are from:

ftp.ebi.ac.uk/pub/databases/SPproteomes/fasta\_files/proteomes/

The seven databases (including their designator from ftp.ebi.ac.uk) are:

3702 - Arabidopsis  
 6239 - *C. elegans*  
 7227 - *Drosophila*  
 83333 - *E. coli*  
 9606 - Human  
 10090 - Mouse  
 4932 - *S. cerevisiae*

For each genome, only the putative methyltransferases are shown. Genes considered 'known' were scored as either a methyltransferase or not, this information was used to establish, for each putative, the cumulative percent methyltransferases of the known genes up to that point.

The *Saccharomyces cerevisiae* database used here is different than the one used earlier in this chapter. Additionally, scoring of this database was performed as per the other 6 genomes in this section for consistency.

**Arabidopsis**

| Percentile | Genename                                                                                                   |
|------------|------------------------------------------------------------------------------------------------------------|
| 100        | Q9ZVM5 (Q9ZVM5) T22H22.9 protein                                                                           |
| 100        | Q9SUC2 (Q9SUC2) Hypothetical 106.1 kDa protein                                                             |
| 100        | Q9SUC1 (Q9SUC1) Hypothetical 97.7 kDa protein                                                              |
| 100        | Q9SGV5 (Q9SGV5) F1N19.17                                                                                   |
| 100        | Q9MAT5 (Q9MAT5) F13M7.14 protein<br>(At1g04870/F13M7_12)                                                   |
| 100        | Q9M9E5 (Q9M9E5) F3F9.21                                                                                    |
| 100        | Q9LY74 (Q9LY74) Putative chloroplast inner<br>envelope protein                                             |
| 100        | Q9LSR5 (Q9LSR5) Gb AAF35419.1                                                                              |
| 100        | Q9LR22 (Q9LR22) F26F24.24                                                                                  |
| 100        | Q9LQD5 (Q9LQD5) F28C11.1 (Fragment)                                                                        |
| 100        | Q9LMH1 (Q9LMH1) F16A14.7                                                                                   |
| 100        | Q9LDW4 (Q9LDW4) Genomic DNA, chromosome 3, P1<br>clone: MJK13 (MJK13.19 protein) (Hypothetical<br>protein) |
| 100        | Q9FGZ0 (Q9FGZ0) Genomic DNA, chromosome 5, TAC<br>clone:K6M13                                              |

|     |                 |                                                                           |
|-----|-----------------|---------------------------------------------------------------------------|
| 100 | Q9C8X9 (Q9C8X9) | Hypothetical 42.8 kDa protein                                             |
| 100 | Q9C786 (Q9C786) | Hypothetical 87.5 kDa protein                                             |
| 100 | O64850 (O64850) | Hypothetical 63.8 kDa protein                                             |
| 97  | Q9SVL4 (Q9SVL4) | Hypothetical 27.9 kDa protein                                             |
| 97  | Q9LY86 (Q9LY86) | Hypothetical 72.0 kDa protein                                             |
| 97  | Q9FN85 (Q9FN85) | Gb AAB08476.1                                                             |
| 97  | O23261 (O23261) | Hypothetical 29.3 kDa protein                                             |
| 96  | Q9ZW75 (Q9ZW75) | At2g43200 protein                                                         |
| 96  | Q9ZPT3 (Q9ZPT3) | At2g14060 protein                                                         |
| 96  | Q9SMZ8 (Q9SMZ8) | Hypothetical 19.6 kDa protein                                             |
| 96  | Q9SMZ7 (Q9SMZ7) | Hypothetical 34.3 kDa protein                                             |
| 96  | Q9MAT8 (Q9MAT8) | F13M7.11                                                                  |
| 96  | Q9LU61 (Q9LU61) | Similarity to unknown protein                                             |
| 96  | Q9LQ17 (Q9LQ17) | F16P17.4 protein                                                          |
| 96  | Q9LPD3 (Q9LPD3) | F22M8.1 protein (Fragment)                                                |
| 96  | Q9FZD0 (Q9FZD0) | T1K7.18 protein                                                           |
| 96  | Q9FX78 (Q9FX78) | F19K19.6 protein                                                          |
| 96  | Q9C9M4 (Q9C9M4) | Hypothetical 39.3 kDa protein                                             |
| 96  | Q9C9M3 (Q9C9M3) | Hypothetical 39.8 kDa protein                                             |
| 96  | Q9C9M2 (Q9C9M2) | Hypothetical 39.9 kDa protein                                             |
| 96  | Q8S8J5 (Q8S8J5) | Hypothetical 71.0 kDa protein                                             |
| 96  | P93817 (P93817) | F19P19.11 protein                                                         |
| 96  | O80564 (O80564) | At2g43940 protein                                                         |
| 91  | Q9ZVC3 (Q9ZVC3) | Putative embryo-abundant protein                                          |
| 91  | Q9XI57 (Q9XI57) | F9L1.6                                                                    |
| 91  | Q9SZ01 (Q9SZ01) | Hypothetical 22.7 kDa protein                                             |
| 91  | Q9SS32 (Q9SS32) | F14P13.20 protein                                                         |
| 91  | Q9SIZ3 (Q9SIZ3) | Expressed protein (Hypothetical 66.8 kDa protein T07M07.16)               |
| 91  | Q9SHK0 (Q9SHK0) | F12K11.10                                                                 |
| 91  | Q9LZA4 (Q9LZA4) | Hypothetical 68.4 kDa protein (AT5g04060/F8F6_270)                        |
| 91  | Q9LYN3 (Q9LYN3) | Hypothetical 70.0 kDa protein                                             |
| 91  | Q9LYM9 (Q9LYM9) | Hypothetical 50.6 kDa protein                                             |
| 91  | Q9LYK0 (Q9LYK0) | Hypothetical 41.7 kDa protein                                             |
| 91  | Q9LFB3 (Q9LFB3) | Cell division-like protein                                                |
| 91  | Q9FYC4 (Q9FYC4) | AtPP-like protein                                                         |
| 91  | Q9FYC3 (Q9FYC3) | AtPP-like protein                                                         |
| 91  | Q9FI20 (Q9FI20) | Genomic DNA, chromosome 5, P1 clone:MFC16                                 |
| 91  | Q9CAU5 (Q9CAU5) | Hypothetical 29.6 kDa protein                                             |
| 86  | Q9FMI5 (Q9FMI5) | Genomic DNA, chromosome 5, P1 clone:MHJ24 (Hypothetical 42.2 kDa protein) |
| 85  | Q9ZVU4 (Q9ZVU4) | T5A14.14 protein (At1g55450/T5A14_14)                                     |
| 85  | Q9FMJ2 (Q9FMJ2) | Ankyrin-like protein                                                      |
| 84  | Q9LSI8 (Q9LSI8) | Gb AAC66597.1 (Hypothetical 34.8 kDa protein)                             |
| 84  | Q9FX27 (Q9FX27) | Tumor-related protein, putative                                           |

|    |                 |                                                                                                                        |
|----|-----------------|------------------------------------------------------------------------------------------------------------------------|
| 84 | Q9FGA0 (Q9FGA0) | Similarity to glucose inhibited division protein B                                                                     |
| 84 | Q9FG39 (Q9FG39) | Ankyrin-like protein                                                                                                   |
| 84 | O65592 (O65592) | Hypothetical 68.3 kDa protein                                                                                          |
| 83 | Q9SX27 (Q9SX27) | F24J5.12 protein                                                                                                       |
| 83 | Q9SW10 (Q9SW10) | Hypothetical 92.2 kDa protein (Fragment)                                                                               |
| 82 | Q9SGD4 (Q9SGD4) | T23G18.12                                                                                                              |
| 82 | Q9SD39 (Q9SD39) | Hypothetical 101.4 kDa protein                                                                                         |
| 82 | Q9S9V3 (Q9S9V3) | T19J18.2 protein (AT4G04670 protein)                                                                                   |
| 82 | Q9S9P4 (Q9S9P4) | F26G16.17 protein                                                                                                      |
| 82 | Q9MAP0 (Q9MAP0) | CDS (At1g33030/F9L11_18)                                                                                               |
| 82 | Q9M2E3 (Q9M2E3) | Hypothetical 29.6 kDa protein                                                                                          |
| 82 | Q9M064 (Q9M064) | Hypothetical 7.0 kDa protein                                                                                           |
| 82 | Q9LW67 (Q9LW67) | Ankyrin-like protein                                                                                                   |
| 82 | Q9LPU8 (Q9LPU8) | T22I11.4 protein                                                                                                       |
| 82 | Q9LPU6 (Q9LPU6) | T22I11.6 protein                                                                                                       |
| 82 | Q9LK68 (Q9LK68) | Cyclopocyclopropane fatty acid synthase-like protein                                                                   |
| 82 | Q9FVV4 (Q9FVV4) | Putative DEAD/DEAH box helicase                                                                                        |
| 82 | Q9FJ53 (Q9FJ53) | Tumor-related protein-like                                                                                             |
| 82 | Q9CAX9 (Q9CAX9) | Hypothetical 37.6 kDa protein                                                                                          |
| 82 | Q9C8R0 (Q9C8R0) | Hypothetical 6.8 kDa protein                                                                                           |
| 82 | Q9C7Q4 (Q9C7Q4) | Hypothetical 87.0 kDa protein                                                                                          |
| 82 | O82251 (O82251) | At2g47840 protein                                                                                                      |
| 82 | O80779 (O80779) | Hypothetical 86.8 kDa protein At2g34300                                                                                |
| 82 | O80562 (O80562) | At2g43920 protein                                                                                                      |
| 82 | O23292 (O23292) | Ankyrin homolog (Ankyrin like protein)                                                                                 |
| 82 | O22847 (O22847) | Expressed protein (At2g43320/T1O24.6)                                                                                  |
| 81 | Q9LUT4 (Q9LUT4) | Gb AAF34859.1                                                                                                          |
| 80 | Q9FG73 (Q9FG73) | Nucleolar protein-like                                                                                                 |
| 80 | O48783 (O48783) | At2g26680 protein                                                                                                      |
| 78 | Q9ZW86 (Q9ZW86) | At2g43080 protein (Hypothetical 31.5 kDa protein)                                                                      |
| 78 | Q9ZPI0 (Q9ZPI0) | F15P23.2 protein (PREDICTED protein of unknown function)                                                               |
| 78 | Q9SRZ0 (Q9SRZ0) | F22D16.2 protein                                                                                                       |
| 78 | Q9M389 (Q9M389) | Putative embryonic abundant protein                                                                                    |
| 78 | Q9M1Y1 (Q9M1Y1) | Hypothetical 46.0 kDa protein                                                                                          |
| 78 | Q9M0V2 (Q9M0V2) | Hypothetical 13.0 kDa protein                                                                                          |
| 78 | Q9LXE5 (Q9LXE5) | Hypothetical 43.0 kDa protein                                                                                          |
| 78 | Q9LV25 (Q9LV25) | Genomic DNA, chromosome 3, P1 clone: MRC8                                                                              |
| 78 | Q9LUU0 (Q9LUU0) | Genomic DNA, chromosome 3, P1 clone: MGD8 (EC 2.1.1.73) (Modification methylase) (Cytosine-specific methyltransferase) |

78 Q9LNS9 (Q9LNS9) T20H2.20 protein  
78 Q9LMZ5 (Q9LMZ5) T6D22.22  
78 Q9LK81 (Q9LK81) Regulator of chromosome  
condensation (Cell cycle regulatory protein) like  
78 Q9LDL2 (Q9LDL2) Hypothetical 70.6 kDa protein  
78 Q9FM44 (Q9FM44) Similarity to unknown protein  
78 Q9FFH2 (Q9FFH2) Genomic DNA, chromosome 5, P1  
clone:MLN1 (Hypothetical 26.1 kDa protein)  
78 Q9C9R8 (Q9C9R8) Hypothetical 34.8 kDa protein  
77 Q9MAA9 (Q9MAA9) T12H1.6 protein (Hypothetical  
37.7 kDa protein)  
77 Q9FZ86 (Q9FZ86) F25I16.1 protein (Hypothetical  
protein)  
77 O23595 (O23595) Hypothetical 23.1 kDa protein  
75 Q9FIK9 (Q9FIK9) Putative 60S acidic ribosomal  
protein P1  
74 Q9LFN2 (Q9LFN2) Hypothetical 65.9 kDa protein  
74 Q9FKW7 (Q9FKW7) Similarity to nucleolar protein  
74 Q9C9N4 (Q9C9N4) Hypothetical protein  
72 Q9ZT99 (Q9ZT99) Putative WD-repeat protein  
72 Q9SMU0 (Q9SMU0) Hypothetical 50.8 kDa protein  
72 Q9SJZ4 (Q9SJZ4) At2g22400 protein  
72 Q9SD84 (Q9SD84) Hypothetical 19.9 kDa protein  
72 Q9M9F2 (Q9M9F2) F3F9.13  
72 Q9M372 (Q9M372) Hypothetical 14.5 kDa protein  
72 Q9LU80 (Q9LU80) Gb|AAF35409.1  
72 O65368 (O65368) F12F1.2 protein  
71 Q9M2E8 (Q9M2E8) Putative homeobox protein  
71 Q9LK54 (Q9LK54) Similarity to SUN and FMU  
proteins  
71 O81026 (O81026) At2g26810 protein  
70 Q9FEF8 (Q9FEF8) Fibrillarin-like (Fibrillarin 1)  
(AT5g52470/K24M7\_22)  
69 Q9SZZ1 (Q9SZZ1) Fibrillarin-like protein  
(Fibrillarin 2) (AtFib2)  
69 Q9SZP4 (Q9SZP4) Putative thaumatin-like protein  
69 O82166 (O82166) Putative AT-hook DNA-binding  
protein  
69 O80723 (O80723) Putative peptide chain release  
factor  
67 Q9MA14 (Q9MA14) F20B17.4  
67 Q9LNF3 (Q9LNF3) F21D18.28  
66 Q9SVX0 (Q9SVX0) Ankyrin repeat-containing protein  
2  
66 Q9LMC1 (Q9LMC1) F14D16.22  
65 Q9FI29 (Q9FI29) Genomic DNA, chromosome 5, P1  
clone:MDN11  
65 Q9FGL2 (Q9FGL2) Membrane channel protein-like,  
aquaporin (Tonoplast intrinsic protein)-like  
65 Q43352 (Q43352) Delta tonoplast integral protein  
delta-TIP (Putative membrane channel protein root

specific) (Delta tonoplast intrinsic protein)

64 RL11\_ARATH (O23095) 60S acidic ribosomal protein P1

64 Q9SUY4 (Q9SUY4) Hypothetical 41.8 kDa protein

64 Q9SUW6 (Q9SUW6) Hypothetical 29.1 kDa protein

64 Q9LI87 (Q9LI87) Emb|CAB12631.1

64 Q9FIC3 (Q9FIC3) Genomic DNA, chromosome 5, P1 clone:MYH9 (Hypothetical protein)

64 O65687 (O65687) Hypothetical protein

64 O64489 (O64489) F20D22.5 protein

64 O23577 (O23577) Membrane channel protein (AT4G17340/DL4705W)

63 TBG1\_ARATH (P38557) Tubulin gamma-1 chain (Gamma-1 tubulin)

63 Q9LVX0 (Q9LVX0) RING zinc finger protein-like (Hypothetical protein)

61 Q9ZVB9 (Q9ZVB9) Putative DNA-directed RNA polymerase 23kD subunit (At2g41340/F13H10.11)

61 Q9LZ18 (Q9LZ18) Hypothetical 6.0 kDa protein (Genomic DNA, chromosome 5, P1 clone:MUK11)

61 Q9FVS7 (Q9FVS7) Hypothetical 62.1 kDa protein

61 Q9FVR9 (Q9FVR9) Hypothetical protein

61 Q9FHB3 (Q9FHB3) Fibrillarin-like

61 O64750 (O64750) At2g34860 protein (Hypothetical protein)

59 Q9SYZ6 (Q9SYZ6) Hypothetical 116.6 kDa protein

59 Q9SKE5 (Q9SKE5) Putative photomorphogenesis repressor protein

59 Q9SJ47 (Q9SJ47) At2g36030 protein

59 Q9LJQ5 (Q9LJQ5) Seed maturation protein-like

59 Q9LE79 (Q9LE79) T12C24.4 (F5O11.24)

59 Q9FL03 (Q9FL03) SCARECROW gene regulator

59 O80659 (O80659) T14N5.11 protein

59 O04655 (O04655) A\_TM021B04.4 protein

58 Q9SR84 (Q9SR84) T16O11.23 protein

58 Q9M133 (Q9M133) Hypothetical 126.0 kDa protein

58 O23277 (O23277) Hypothetical 142.3 kDa protein

56 Q9SZW7 (Q9SZW7) Hypothetical 37.5 kDa protein

55 Q9SR17 (Q9SR17) F7O18.4 protein (Putative DNA-binding protein)

55 Q9FX61 (Q9FX61) T6J4.11 protein

54 Q9ZQ40 (Q9ZQ40) Putative SET-domain protein

54 Q9LRV6 (Q9LRV6) Salt-stress induced tonoplast intrinsic protein (AT3g26520/MFE16\_3)

54 O23393 (O23393) Hypothetical protein (HSR201 like protein)

53 Q9LIN4 (Q9LIN4) Hypothetical 54.6 kDa protein

53 O80829 (O80829) At2g45900 protein

51 Q9SX97 (Q9SX97) F16N3.5 protein

51 Q9STY6 (Q9STY6) 40S ribosomal protein S20-like

|                   |                                                                                                   |
|-------------------|---------------------------------------------------------------------------------------------------|
|                   | protein                                                                                           |
| 51                | Q9M8U2 (Q9M8U2) F13E7.4 protein                                                                   |
| 51                | Q42453 (Q42453) Zinc finger protein (Zinc finger protein ZAT7)                                    |
| 50                | RS20_ARATH (P49200) 40S ribosomal protein S20                                                     |
| 50                | Q9XH28 (Q9XH28) F10A2.10 protein (Putative peptidase)                                             |
| 50                | Q9T0F9 (Q9T0F9) Hypothetical 72.2 kDa protein                                                     |
| 50                | Q9SYI6 (Q9SYI6) PREDICTED protein of unknown function                                             |
| 50                | Q9M2S3 (Q9M2S3) Hypothetical protein                                                              |
| 50                | Q9M0V1 (Q9M0V1) D123-like protein                                                                 |
| 50                | Q9LZW8 (Q9LZW8) Hypothetical 50.3 kDa protein                                                     |
| 50                | Q9LZ02 (Q9LZ02) Hypothetical 88.9 kDa protein                                                     |
| 50                | Q9LRV7 (Q9LRV7) Gb AAF04880.1                                                                     |
| 50                | Q9LN86 (Q9LN86) T12C24.14                                                                         |
| 50                | Q9LFM5 (Q9LFM5) Hypothetical 45.4 kDa protein                                                     |
| 50                | Q9FWR8 (Q9FWR8) F14P1.3 protein                                                                   |
| 50                | Q9FMP6 (Q9FMP6) Genomic DNA, chromosome 5, P1 clone:MXC9                                          |
| 50                | Q9FF16 (Q9FF16) DNA repair protein RAD23 homolog (Hypothetical protein) (At5g38470/At5g38470)     |
| 50                | P93823 (P93823) F19P19.21                                                                         |
| 50                | O23471 (O23471) SIMILARITY to glycine-rich protein 1 - ARABIDOPSIS (Glycine-rich protein homolog) |
| <b>C. elegans</b> |                                                                                                   |
| 100               | YNE4_CAEEL (P30643) Hypothetical protein R08D7.4 in chromosome III                                |
| 100               | Q9XXH6 (Q9XXH6) Y17G7B.18b protein                                                                |
| 100               | Q9XXH0 (Q9XXH0) Y32B12A.3 protein                                                                 |
| 100               | Q9XW42 (Q9XW42) W06D4.4 protein                                                                   |
| 100               | Q9XVS1 (Q9XVS1) C25A1.3 protein                                                                   |
| 100               | Q9U2X0 (Q9U2X0) Y113G7B.17 protein                                                                |
| 100               | Q9U2R0 (Q9U2R0) Y17G7B.18a protein                                                                |
| 100               | Q9TYP1 (Q9TYP1) Hypothetical 37.8 kDa protein                                                     |
| 100               | Q9NAP7 (Q9NAP7) K09E4.3 protein                                                                   |
| 100               | Q9NAA8 (Q9NAA8) Y53F4B.4a protein                                                                 |
| 100               | Q9N5L0 (Q9N5L0) H24K24.4 protein                                                                  |
| 100               | Q9GZF8 (Q9GZF8) Hypothetical 17.0 kDa protein                                                     |
| 100               | Q9GYH9 (Q9GYH9) Hypothetical 26.0 kDa protein                                                     |
| 100               | Q965W4 (Q965W4) Hypothetical protein Y40B10A.6                                                    |
| 100               | Q95X52 (Q95X52) Hypothetical 32.1 kDa protein                                                     |
| 100               | Q95PW7 (Q95PW7) Hypothetical 56.4 kDa protein                                                     |
| 100               | Q8MQD1 (Q8MQD1) Hypothetical protein C23G10.7a                                                    |
| 100               | Q8MQD0 (Q8MQD0) Hypothetical protein C23G10.7b                                                    |
| 100               | Q23552 (Q23552) Hypothetical 57.3 kDa protein                                                     |
| 100               | Q23126 (Q23126) W02B12.10 protein                                                                 |
| 100               | Q22993 (Q22993) Hypothetical 49.8 kDa protein                                                     |

Automated Identification of Putative Methyltransferases

|     |                     |                                                         |
|-----|---------------------|---------------------------------------------------------|
| 100 | Q22123 (Q22123)     | Hypothetical 33.7 kDa protein                           |
| 100 | Q18511 (Q18511)     | C38D4.9 protein                                         |
| 100 | P91862 (P91862)     | F32A7.4 protein                                         |
| 100 | P91387 (P91387)     | Hypothetical 43.8 kDa protein                           |
| 100 | O61833 (O61833)     | Hypothetical 41.4 kDa protein                           |
| 100 | O18235 (O18235)     | Y57G11C.11 protein                                      |
| 100 | O16582 (O16582)     | Hypothetical 26.0 kDa protein                           |
| 100 | O02325 (O02325)     | T23B5.1 protein                                         |
| 100 | O01889 (O01889)     | R08F11.4 protein                                        |
| 100 | O01594 (O01594)     | Hypothetical protein R08E5.1                            |
| 100 | O01593 (O01593)     | R08E5.3 protein                                         |
| 100 | O01503 (O01503)     | Hypothetical 29.9 kDa protein                           |
| 83  | YKA2_CAEEL (P34254) | Hypothetical protein B0303.2 in chromosome III          |
| 83  | Q9XX11 (Q9XX11)     | Y39A1A.21 protein                                       |
| 83  | Q9XTE1 (Q9XTE1)     | F13D12.9 protein                                        |
| 83  | Q9U3P9 (Q9U3P9)     | C14B1.10 protein                                        |
| 83  | Q9TYV5 (Q9TYV5)     | Hypothetical 73.9 kDa protein                           |
| 83  | Q9N4H1 (Q9N4H1)     | Hypothetical 49.2 kDa protein                           |
| 83  | Q9N4D9 (Q9N4D9)     | Hypothetical 26.6 kDa protein                           |
| 83  | Q94013 (Q94013)     | T08G11.4 protein                                        |
| 83  | Q93574 (Q93574)     | F25H2.12 protein                                        |
| 83  | Q8WTM3 (Q8WTM3)     | Hypothetical 24.9 kDa protein                           |
| 83  | Q23383 (Q23383)     | ZK1058.5 protein                                        |
| 83  | Q20856 (Q20856)     | F55G7.2 protein                                         |
| 83  | Q20308 (Q20308)     | Hypothetical 30.9 kDa protein                           |
| 83  | Q18489 (Q18489)     | Hypothetical 40.7 kDa protein                           |
| 83  | O62483 (O62483)     | Y48E1C.2 protein                                        |
| 83  | O62266 (O62266)     | F57G9.1 protein                                         |
| 83  | O44410 (O44410)     | Hypothetical 39.4 kDa protein                           |
| 83  | O17735 (O17735)     | D2023.6 protein                                         |
| 83  | O17704 (O17704)     | C53A5.2 protein                                         |
| 80  | Q21069 (Q21069)     | K01A11.2 protein                                        |
| 75  | YOT0_CAEEL (P34655) | Hypothetical 8.7 kDa protein ZK632.10 in chromosome III |
| 75  | Q9XVX3 (Q9XVX3)     | C06A1.6 protein                                         |
| 75  | Q9XUJ4 (Q9XUJ4)     | W09D6.1 protein                                         |
| 75  | Q9N4K2 (Q9N4K2)     | Hypothetical 81.7 kDa protein                           |
| 75  | Q95XQ0 (Q95XQ0)     | Hypothetical 111.3 kDa protein                          |
| 75  | Q95QY1 (Q95QY1)     | Hypothetical 17.0 kDa protein                           |
| 75  | Q8MQ78 (Q8MQ78)     | Hypothetical protein F11C7.7                            |
| 75  | Q23375 (Q23375)     | ZC53.6 protein                                          |
| 75  | Q22392 (Q22392)     | T11F9.11 protein                                        |
| 75  | Q22279 (Q22279)     | T07C12.9 protein                                        |
| 75  | Q21096 (Q21096)     | K01D12.6 protein                                        |
| 75  | Q20794 (Q20794)     | F54F7.7 protein                                         |
| 75  | Q20587 (Q20587)     | F49C12.10 protein                                       |
| 75  | Q19647 (Q19647)     | Hypothetical protein                                    |

Automated Identification of Putative Methyltransferases

75 Q19176 (Q19176) F07H5.6 protein  
75 Q18883 (Q18883) Hypothetical 24.2 kDa protein  
75 Q18464 (Q18464) Hypothetical 25.5 kDa protein  
75 Q18238 (Q18238) Hypothetical 18.9 kDa protein  
75 Q17596 (Q17596) C03A3.3 protein  
75 O62365 (O62365) W02A11.1 protein  
75 O62133 (O62133) F02H6.5 protein  
75 O17997 (O17997) R10D12.11 protein  
75 O01985 (O01985) F30F8.8 protein  
71 Q9BL15 (Q9BL15) Hypothetical 73.8 kDa protein  
71 Q965Y2 (Q965Y2) Hypothetical protein Y32G9B.1  
71 Q965W3 (Q965W3) Hypothetical protein Y40B10A.2  
71 Q22048 (Q22048) T01B7.8 protein  
71 P91424 (P91424) Hypothetical 41.9 kDa protein  
71 O61706 (O61706) Hypothetical 76.4 kDa protein  
71 O02290 (O02290) T02E1.4 protein  
67 YPL1\_CAEEL (Q9U3G6) Yippee-like protein F37A8.5  
67 YDEM\_CAEEL (Q19124) Hypothetical 65.5 kDa Trp-Asp repeats containing protein F02E8.5 in chromosome X  
67 Q9N470 (Q9N470) Hypothetical 41.5 kDa protein  
67 Q9N2S1 (Q9N2S1) Y9C9A.16 protein  
67 Q95XR2 (Q95XR2) Hypothetical 51.5 kDa protein  
67 Q95XP7 (Q95XP7) Hypothetical 7.2 kDa protein  
67 Q95Q69 (Q95Q69) Hypothetical 61.0 kDa protein  
67 Q8WSW2 (Q8WSW2) Hypothetical 40.9 kDa protein  
67 Q23200 (Q23200) W06D11.4 protein  
67 Q22577 (Q22577) Hypothetical 19.7 kDa protein  
67 P91137 (P91137) Hypothetical 57.6 kDa protein  
67 P91125 (P91125) Hypothetical 35.8 kDa protein  
67 O45602 (O45602) H02I12.4 protein  
67 O18030 (O18030) T05F1.10 protein  
67 O16995 (O16995) Hypothetical 29.3 kDa protein  
60 YLN2\_CAEEL (Q18964) Hypothetical 46.2 kDa Trp-Asp repeats containing protein D2013.2 in chromosome II  
60 SOX\_CAEEL (Q18006) Potential sarcosine oxidase (EC 1.5.3.1)  
60 Q19864 (Q19864) F28C6.3 protein  
60 Q19843 (Q19843) Hypothetical 48.0 kDa protein  
55 YWS6\_CAEEL (Q10942) Hypothetical protein B0310.6 in chromosome X  
55 YW91\_CAEEL (Q22712) Hypothetical 105.4 kDa protein T24A11.1 in chromosome III  
55 YS02\_CAEEL (Q09357) Hypothetical 55.5 kDa protein ZK1128.2 in chromosome III  
55 YLW9\_CAEEL (P34412) Hypothetical protein F22B7.9 in chromosome III  
55 YKQ5\_CAEEL (P34300) Hypothetical protein C06E1.5 in chromosome III



Automated Identification of Putative Methyltransferases

|                   |                     |                                                 |
|-------------------|---------------------|-------------------------------------------------|
| 55                | Q9XW93 (Q9XW93)     | Y49A3A.3 protein                                |
| 55                | Q9XVX5 (Q9XVX5)     | ZK1128.8 protein                                |
| 55                | Q9XVU6 (Q9XVU6)     | T07F10.6 protein                                |
| 55                | Q9XUV3 (Q9XUV3)     | K02E2.4 protein                                 |
| 55                | Q9UAQ2 (Q9UAQ2)     | Hypothetical 184.6 kDa protein                  |
| 55                | Q9U322 (Q9U322)     | Y105C5A.16 protein                              |
| 55                | Q9TXS1 (Q9TXS1)     | Hypothetical 26.1 kDa protein                   |
| 55                | Q9TVS9 (Q9TVS9)     | T21B6.5 protein                                 |
| 55                | Q9GZD0 (Q9GZD0)     | Hypothetical 32.0 kDa protein                   |
| 55                | Q9GYS4 (Q9GYS4)     | Hypothetical 20.3 kDa protein                   |
| 55                | Q9BHK8 (Q9BHK8)     | Y39G8C.2 protein                                |
| 55                | Q8WSM1 (Q8WSM1)     | Hypothetical 175.6 kDa protein                  |
| 55                | Q8WQB3 (Q8WQB3)     | Y105E8A.9 protein                               |
| 55                | Q8MYN7 (Q8MYN7)     | Y39B6A.22 protein                               |
| 55                | Q8MYN6 (Q8MYN6)     | Y39B6A.23 protein                               |
| 55                | Q8MXV7 (Q8MXV7)     | GLR-6 protein (corresponding sequence F41B4.4b) |
| 55                | Q8MXE3 (Q8MXE3)     | Hypothetical protein Y39D8A.1a                  |
| 55                | Q8MPS8 (Q8MPS8)     | Hypothetical protein W05H7.4c                   |
| 55                | Q23195 (Q23195)     | Hypothetical 57.9 kDa protein                   |
| 55                | Q21503 (Q21503)     | M04B2.2 protein                                 |
| 55                | Q21321 (Q21321)     | Hypothetical 67.4 kDa protein                   |
| 55                | Q20998 (Q20998)     | Hypothetical 26.3 kDa protein                   |
| 55                | Q19059 (Q19059)     | Hypothetical 48.8 kDa protein                   |
| 55                | Q19030 (Q19030)     | Hypothetical 46.3 kDa protein                   |
| 55                | Q18663 (Q18663)     | Hypothetical protein C46H3.3                    |
| 55                | Q18256 (Q18256)     | C27D9.2 protein                                 |
| 55                | Q09590 (Q09590)     | Hypothetical 75.2 kDa protein                   |
| 55                | PWP2_CAEEL (P91341) | Periodic tryptophan protein 2 homolog           |
| 55                | P91215 (P91215)     | Hypothetical 27.2 kDa protein                   |
| 55                | P91143 (P91143)     | Hypothetical protein                            |
| 55                | O62450 (O62450)     | Y44A6B.2 protein                                |
| 55                | O62339 (O62339)     | R06C1.1 protein                                 |
| 55                | O62107 (O62107)     | C47B2.6 protein                                 |
| 55                | O61832 (O61832)     | Hypothetical 16.3 kDa protein                   |
| 55                | O45178 (O45178)     | Hypothetical 44.6 kDa protein                   |
| 55                | O44897 (O44897)     | ZK484.2 protein                                 |
| 55                | O18198 (O18198)     | Y48E1B.4 protein                                |
| 55                | O17034 (O17034)     | Hypothetical 41.6 kDa protein                   |
| <b>Drosophila</b> |                     |                                                 |
| 100               | Q9XZ11 (Q9XZ11)     | BCDNA:LD21293 protein                           |
| 100               | Q9W4M9 (Q9W4M9)     | CG6133 protein (LD45754P)                       |
| 100               | Q9W3W2 (Q9W3W2)     | CG14436 protein                                 |
| 100               | Q9W3E7 (Q9W3E7)     | CG15351 protein                                 |
| 100               | Q9W324 (Q9W324)     | CG3101 protein                                  |
| 100               | Q9W232 (Q9W232)     | CG17807 protein                                 |
| 100               | Q9W1V1 (Q9W1V1)     | CG9882 protein                                  |

Automated Identification of Putative Methyltransferases

|     |        |          |         |         |                                  |
|-----|--------|----------|---------|---------|----------------------------------|
| 100 | Q9W1H1 | (Q9W1H1) | CG5339  | protein | (GH17155p)                       |
| 100 | Q9W0Y5 | (Q9W0Y5) | CG30427 | protein | (LD36843p)                       |
| 100 | Q9W0J9 | (Q9W0J9) | CG9119  | protein | (GH07301P)                       |
| 100 | Q9W0C0 | (Q9W0C0) | CG13929 | protein |                                  |
| 100 | Q9VZF6 | (Q9VZF6) | CG14997 | protein |                                  |
| 100 | Q9VZD2 | (Q9VZD2) | CG11342 | protein |                                  |
| 100 | Q9VYF8 | (Q9VYF8) | CG2453  | protein |                                  |
| 100 | Q9VXK5 | (Q9VXK5) | CG8939  | protein | (LD23718p)                       |
| 100 | Q9VWJ9 | (Q9VWJ9) | CG7889  | protein | (GM08857P)                       |
| 100 | Q9VVX7 | (Q9VVX7) | CG9666  | protein |                                  |
| 100 | Q9VVV7 | (Q9VVV7) | CG3808  | protein |                                  |
| 100 | Q9VUX8 | (Q9VUX8) | CG13075 | protein |                                  |
| 100 | Q9VUJ6 | (Q9VUJ6) | CG13462 | protein |                                  |
| 100 | Q9VTV1 | (Q9VTV1) | CG5632  | protein | (LD47568P)                       |
| 100 | Q9VTM5 | (Q9VTM5) | CG7319  | protein | (LD40326p)                       |
| 100 | Q9VR91 | (Q9VR91) | HERC2   | protein |                                  |
| 100 | Q9VQX9 | (Q9VQX9) | CG3675  | protein |                                  |
| 100 | Q9VQK8 | (Q9VQK8) | CG17219 | protein |                                  |
| 100 | Q9VQJ8 | (Q9VQJ8) | CG9643  | protein | (AT11165p)                       |
| 100 | Q9VQF8 | (Q9VQF8) | CG9960  | protein | (GH13185p)                       |
| 100 | Q9VPX3 | (Q9VPX3) | CG4749  | protein | (LD40271P)                       |
| 100 | Q9VP86 | (Q9VP86) | CG10584 | protein |                                  |
| 100 | Q9VNQ1 | (Q9VNQ1) | CG11109 | protein | (GM05221P)                       |
| 100 | Q9VNH1 | (Q9VNH1) | CG1239  | protein | (LP01332p)                       |
| 100 | Q9VN26 | (Q9VN26) | CG1074  | protein |                                  |
| 100 | Q9VMD3 | (Q9VMD3) | CG9531  | protein |                                  |
| 100 | Q9VLF6 | (Q9VLF6) | CG18661 | protein |                                  |
| 100 | Q9VL60 | (Q9VL60) | CG13126 | protein | (RE01590p)                       |
| 100 | Q9VJQ4 | (Q9VJQ4) | CG3688  | protein | (L(2)35Bd protein)<br>(RE49394p) |
| 100 | Q9VJK8 | (Q9VJK8) | CG17330 | protein |                                  |
| 100 | Q9VJ34 | (Q9VJ34) | CG10428 | protein | (LD29806p)                       |
| 100 | Q9VIF3 | (Q9VIF3) | CG9249  | protein |                                  |
| 100 | Q9VI22 | (Q9VI22) | CG10272 | protein |                                  |
| 100 | Q9VHW6 | (Q9VHW6) | CG10903 | protein | (RE22146p)                       |
| 100 | Q9VHA2 | (Q9VHA2) | CG8327  | protein | (GH08387p)                       |
| 100 | Q9VHA1 | (Q9VHA1) | CG8327  | protein |                                  |
| 100 | Q9VH48 | (Q9VH48) | CG5358  | protein |                                  |
| 100 | Q9VGW7 | (Q9VGW7) | CG6554  | protein | (LD28808p)                       |
| 100 | Q9VG42 | (Q9VG42) | CG6188  | protein |                                  |
| 100 | Q9VFP9 | (Q9VFP9) | CG9929  | protein |                                  |
| 100 | Q9VFP8 | (Q9VFP8) | CG9927  | protein |                                  |
| 100 | Q9VFB3 | (Q9VFB3) | CG6563  | protein | (LD34544P)                       |
| 100 | Q9VF83 | (Q9VF83) | CG12258 | protein |                                  |
| 100 | Q9VEZ4 | (Q9VEZ4) | CG5013  | protein | (RE16487p)                       |
| 100 | Q9VEA4 | (Q9VEA4) | CG31241 | protein |                                  |
| 100 | Q9VDZ5 | (Q9VDZ5) | CG5558  | protein |                                  |
| 100 | Q9VDZ4 | (Q9VDZ4) | CG5558  | protein | (LD16340p)                       |

Automated Identification of Putative Methyltransferases

100 Q9VDP9 (Q9VDP9) CG4390 protein (GH03475p)  
 100 Q9VDC8 (Q9VDC8) CG3337 protein  
 100 Q9VD35 (Q9VD35) CG7080 protein (LD18835P)  
 100 Q9VBJ4 (Q9VBJ4) CG14541 protein  
 100 Q9VBH7 (Q9VBH7) CG14544 protein (SD21096p)  
 100 Q9V8R7 (Q9V8R7) CG7137 protein (LD11455P)  
 100 Q9V790 (Q9V790) CG7544 protein (LD39460p)  
 100 Q9V6C4 (Q9V6C4) CG8545 protein  
 100 Q9V631 (Q9V631) CG8280 protein  
 100 Q9V5C9 (Q9V5C9) CG1675 protein  
 100 Q9V341 (Q9V341) CG2906 protein  
 100 Q9I7P7 (Q9I7P7) BcDNA:LD21293 protein  
 100 Q8SX32 (Q8SX32) RE49877p (CG16840 protein)  
 100 Q8MKN5 (Q8MKN5) CG2906-PB  
 100 O77263 (O77263) EG:22E5.4 protein (GM01339p)  
 100 O16868 (O16868) FY gene product (AT05453p)  
 100 AAN13657 (AAN13657) CG31392-PA  
 100 AAN13635 (AAN13635) CG6563-PB  
 100 AAN13380 (AAN13380) CG10272-PC  
 100 AAN12208 (AAN12208) CG11109-PB  
 100 AAN11763 (AAN11763) CG32152-PA  
 100 AAN11538 (AAN11538) CG32281-PA  
 100 AAN09627 (AAN09627) CG32691-PA  
 100 AAN09611 (AAN09611) CG32697-PD  
 100 AAM68350 (AAM68350) CG8276-PA  
 71 Y105\_DROME (Q9V719) Hypothetical protein CG10105  
 71 Q9VHB9 (Q9VHB9) CG9386 protein (RE33302p)  
 71 Q9V505 (Q9V505) CG8232 protein  
 71 Q8MLS2 (Q8MLS2) CG30410-PA  
 71 AAN10384 (AAN10384) CG31698-PA  
 62 Q9W5F6 (Q9W5F6) EG:171D11.2 protein  
 62 Q9W323 (Q9W323) CG32697 protein (LD27988p)  
 62 Q9VYT1 (Q9VYT1) CG11802 protein (LD30509p)  
 62 Q9VVL7 (Q9VVL7) CG7430 protein (LP04889P)  
 62 Q9VMB4 (Q9VMB4) CG11319 protein (RE27507p)  
 62 Q9VIR5 (Q9VIR5) CG13959 protein  
 62 Q9VG89 (Q9VG89) CG17793 protein  
 62 Q9VG21 (Q9VG21) CG10909 protein  
 62 Q9VFT8 (Q9VFT8) CG14368 protein  
 62 Q9VEI4 (Q9VEI4) CG7606 protein  
 62 Q9VAZ5 (Q9VAZ5) CG12873 protein  
 62 Q9V9C9 (Q9V9C9) CG3174 protein (GH12207P)  
 62 Q9V8G7 (Q9V8G7) CG17523 protein (RE69679p)  
 62 Q9V759 (Q9V759) CG12856 protein  
 62 Q9I7X6 (Q9I7X6) EG:39E1.1 protein (LD42227p)  
 62 Q8MLS0 (Q8MLS0) CG13551-PC  
 62 O46078 (O46078) EG:39E1.1 protein  
 62 AAN11098 (AAN11098) CG9266-PB

|                       |                                                                                                                                   |
|-----------------------|-----------------------------------------------------------------------------------------------------------------------------------|
| 62                    | AAN09610 (AAN09610) CG32697-PC                                                                                                    |
| 62                    | AAF54576 (AAF54576) CG6608-PA                                                                                                     |
| 62                    | AAF46513 (AAF46513) CG32697-PB                                                                                                    |
| 56                    | RLA1_DROME (P08570) 60S acidic ribosomal protein P1 (RP21C) (Acidic ribosomal protein RPA2)                                       |
| 56                    | Q9W459 (Q9W459) CG4020 protein                                                                                                    |
| 56                    | Q9W1R2 (Q9W1R2) CG13551 protein                                                                                                   |
| 56                    | Q9VYV4 (Q9VYV4) CG2446 protein                                                                                                    |
| 56                    | Q9VU78 (Q9VU78) CG10116 protein                                                                                                   |
| 56                    | Q9VTY8 (Q9VTY8) CG10522 protein                                                                                                   |
| 56                    | Q9VIQ8 (Q9VIQ8) CG10664 protein (GM14452P)                                                                                        |
| 56                    | Q9VIK9 (Q9VIK9) CG2614 protein (LD12777P)                                                                                         |
| 56                    | Q9VIG8 (Q9VIG8) CG9266 protein                                                                                                    |
| 56                    | Q9VHJ8 (Q9VHJ8) CG11963 protein                                                                                                   |
| 56                    | Q9VEX7 (Q9VEX7) CG6889 protein (Tara 1A isoform)                                                                                  |
| 56                    | Q9VDG4 (Q9VDG4) CG10827 protein (LP09756P)                                                                                        |
| 56                    | Q9VC39 (Q9VC39) CG13634 protein                                                                                                   |
| 56                    | Q9VBS8 (Q9VBS8) CG31370 protein                                                                                                   |
| 56                    | Q8SXV9 (Q8SXV9) RH61745p (CG12998 protein)                                                                                        |
| 56                    | Q8MMC5 (Q8MMC5) CG30427-PA                                                                                                        |
| 56                    | Q8MKV9 (Q8MKV9) CG30006-PA                                                                                                        |
| 56                    | JIP1_DROME (Q9W0K0) JNK-interacting protein 1 (JIP-1) (Eye developmental protein SP512) (APP-like interacting protein 1) (APLIP1) |
| 56                    | AAN13701 (AAN13701) CG6889-PB                                                                                                     |
| 56                    | AAN11462 (AAN11462) CG1200-PB                                                                                                     |
| 56                    | AAN10729 (AAN10729) CG31717-PA                                                                                                    |
| 56                    | AAN10397 (AAN10397) CG3059-PC                                                                                                     |
| 56                    | AAF53761 (AAF53761) CG10561-PA                                                                                                    |
| 56                    | AAF45513 (AAF45513) CG32818-PA                                                                                                    |
| 56                    | AAF45509 (AAF45509) CG3156-PA                                                                                                     |
| 56                    | A37C_DROME (P18487) Anon-37Cs protein                                                                                             |
| 50                    | Q9VUJ2 (Q9VUJ2) CG5392 protein                                                                                                    |
| 50                    | AAF54308 (AAF54308) CG11963-PA                                                                                                    |
| <b><i>E. coli</i></b> |                                                                                                                                   |
| 100                   | YJHP_ECOLI (P39367) Hypothetical protein yjhP                                                                                     |
| 100                   | YFIC_ECOLI (P31825) Hypothetical protein yfiC                                                                                     |
| 100                   | YECF_ECOLI (P76291) Hypothetical protein yecP                                                                                     |
| 100                   | TEHB_ECOLI (P25397) Tellurite resistance protein tehB                                                                             |
| 100                   | CFA_ECOLI (P30010) Cyclopropane-fatty-acyl-phospholipid synthase (EC 2.1.1.79) (Cyclopropane fatty acid synthase) (CFA synthase)  |
| 100                   | BIOC_ECOLI (P12999) Biotin synthesis protein bioC                                                                                 |
| 94                    | YNBC_ECOLI (P76092) Hypothetical protein ynbC                                                                                     |
| 94                    | SUN_ECOLI (P36929) SUN protein (FMU protein)                                                                                      |
| 93                    | SMTA_ECOLI (P36566) Protein smtA                                                                                                  |
| 89                    | YEGD_ECOLI (P36928) Hypothetical chaperone protein yegD                                                                           |

Automated Identification of Putative Methyltransferases

|              |                                                                                                  |
|--------------|--------------------------------------------------------------------------------------------------|
| 89           | YECO_ECOLI (P76290) Protein yecO                                                                 |
| 89           | YEBU_ECOLI (P76273) Hypothetical protein yebU                                                    |
| 89           | MREB_ECOLI (P13519) Rod shape-determining protein mreB                                           |
| 89           | FTSZ_ECOLI (P06138) Cell division protein ftsZ                                                   |
| 84           | YDBA_ECOLI (P33666) Hypothetical protein ydbA                                                    |
| 77           | YDCM_ECOLI (P76102) Hypothetical protein ydcM                                                    |
| 72           | YBIN_ECOLI (P75782) Hypothetical protein ybiN                                                    |
| 72           | UVRA_ECOLI (P07671) Excinuclease ABC subunit A                                                   |
| 72           | RPIA_ECOLI (P27252) Ribose 5-phosphate isomerase A (EC 5.3.1.6) (Phosphoriboisomerase A)         |
| 72           | CRCB_ECOLI (P37002) Protein crcB                                                                 |
| 71           | YQGA_ECOLI (Q46831) Hypothetical protein yggA                                                    |
| 66           | YGAZ_ECOLI (P76630) Hypothetical protein ygaZ                                                    |
| 66           | YBHK_ECOLI (P75767) Hypothetical protein ybhK                                                    |
| 59           | YFCE_ECOLI (P76495) Hypothetical protein yfcE                                                    |
| 59           | YCEG_ECOLI (P28306) Hypothetical protein yceG                                                    |
| 59           | EUTN_ECOLI (P77633) Ethanolamine utilization protein eutN                                        |
| 51           | YIID_ECOLI (P32148) Hypothetical protein yiid                                                    |
| 51           | YFCK_ECOLI (P77182) Hypothetical protein yfck                                                    |
| 44           | P75999 (P75999) ORF O243#4                                                                       |
| 37           | YIGE_ECOLI (P27840) Hypothetical protein yigE                                                    |
| 37           | YHIV_ECOLI (P37637) Hypothetical protein yhiV                                                    |
| 37           | YGCB_ECOLI (P38036) Hypothetical protein ygcB                                                    |
| 37           | EUTJ_ECOLI (P77277) Ethanolamine utilization protein eutJ                                        |
| 37           | ACRF_ECOLI (P24181) Acriflavine resistance protein F (Protein envD)                              |
| 34           | YAJF_ECOLI (P23917) Hypothetical protein yajF                                                    |
| 32           | YUAR_ECOLI (P34211) Hypothetical protein yuaR precursor                                          |
| <b>Human</b> |                                                                                                  |
| 100          | Q9Y3W2 (Q9Y3W2) Hypothetical protein (Fragment)                                                  |
| 100          | Q9UI28 (Q9UI28) Adrenal gland protein AD-003                                                     |
| 100          | Q9P0B5 (Q9P0B5) HSPC266 (Fragment)                                                               |
| 100          | Q9NSC9 (Q9NSC9) Olfactory receptor                                                               |
| 100          | Q9NRN9 (Q9NRN9) DC3 (Similar to HSPC133 protein)                                                 |
| 100          | Q9HBK9 (Q9HBK9) Cyt19                                                                            |
| 100          | Q9H8H3 (Q9H8H3) Hypothetical protein FLJ13631 (From clone DKFZp586A0522) (DKFZP586A0522 protein) |
| 100          | Q9H867 (Q9H867) Hypothetical protein FLJ13920                                                    |
| 100          | Q9H825 (Q9H825) Hypothetical protein FLJ13984                                                    |
| 100          | Q9H7R3 (Q9H7R3) Hypothetical protein FLJ14347                                                    |
| 100          | Q9H7H0 (Q9H7H0) Hypothetical protein FLJ20859                                                    |
| 100          | Q9H732 (Q9H732) Hypothetical protein FLJ21453 (HpaII tiny fragments locus 9C)                    |
| 100          | Q9H5Y3 (Q9H5Y3) Hypothetical protein FLJ22789 (Fragment)                                         |

Automated Identification of Putative Methyltransferases

100 Q9H5R7 (Q9H5R7) Hypothetical protein FLJ23133  
 100 Q9H2C6 (Q9H2C6) Odorant receptor HOR3'beta3  
 100 Q9BZH3 (Q9BZH3) False p73 target protein  
 100 Q9BW43 (Q9BW43) Nucleolar protein 1 (120kD)  
 100 Q9BVS5 (Q9BVS5) Hypothetical protein  
 100 Q96S85 (Q96S85) Hypothetical protein  
 100 Q96RS0 (Q96RS0) Hepatocellular carcinoma-associated antigen 137  
 100 Q96ME6 (Q96ME6) Hypothetical protein FLJ32467  
 100 Q96MD6 (Q96MD6) Hypothetical protein FLJ32515  
 100 Q96LV1 (Q96LV1) Hypothetical protein FLJ25048  
 100 Q96LU4 (Q96LU4) Hypothetical protein FLJ25062  
 100 Q96IW1 (Q96IW1) Similar to RIKEN cDNA 0610011F06 gene  
 100 Q96IH9 (Q96IH9) Similar to hypothetical protein FLJ12687  
 100 Q96GJ1 (Q96GJ1) Hypothetical protein  
 100 Q96G04 (Q96G04) Similar to RIKEN cDNA 5730409G15 gene  
 100 Q96AZ1 (Q96AZ1) Hypothetical protein (Hepatocellular carcinoma-associated antigen HCA557a)  
 100 Q8WXB1 (Q8WXB1) Hepatocellular carcinoma-associated antigen HCA557b  
 100 Q8WUW5 (Q8WUW5) Hypothetical protein  
 100 Q8WUV3 (Q8WUV3) Hypothetical protein (Fragment)  
 100 Q8WUI1 (Q8WUI1) Similar to RIKEN cDNA 0610006F02 gene  
 100 Q8TEA1 (Q8TEA1) Hypothetical protein FLJ23743  
 100 Q8TDG9 (Q8TDG9) CLL-associated antigen KW-2  
 100 Q8TCB7 (Q8TCB7) Hypothetical protein  
 100 Q8TC28 (Q8TC28) Similar to RIKEN cDNA 2010208K18 gene  
 100 Q8N6Q8 (Q8N6Q8) Similar to hypothetical protein FLJ22789  
 100 Q8N6F8 (Q8N6F8) Similar to hypothetical protein, MGC: 8159, hypothetical protein MGC8159  
 100 Q8N320 (Q8N320) Hypothetical protein  
 100 Q14105 (Q14105) D1075-like protein (Fragment)  
 100 O95714 (O95714) HERC2 protein  
 100 O95568 (O95568) Hypothetical protein  
 100 O43148 (O43148) Hypothetical protein KIAA0398 (RNA (Guanine-7-) methyltransferase)  
 100 NOL1\_HUMAN (P46087) Proliferating-cell nucleolar antigen p120 (Proliferation-associated nucleolar protein p120)  
 95 U183\_HUMAN (Q9BSU1) UPF0183 protein  
 95 Q9H649 (Q9H649) Hypothetical protein FLJ22609  
 95 Q96FB5 (Q96FB5) Hypothetical protein  
 95 Q96EJ7 (Q96EJ7) Hypothetical protein  
 95 Q96C08 (Q96C08) Hypothetical protein

Automated Identification of Putative Methyltransferases

95 O95668 (O95668) 1C7d  
90 YPL4\_HUMAN (Q96NS1) Yippee-like protein 4  
90 YPL3\_HUMAN (Q9BSJ4) Yippee-like protein 3  
(DiGeorge syndrome-related protein FKSG5)  
90 Q9H4K2 (Q9H4K2) DJ1022E24.4 (continues in  
bA476I15 (AL137028)) (Hypothetical protein)  
90 Q9H342 (Q9H342) HOR5'Beta8  
90 Q9BSP8 (Q9BSP8) Similar to RIKEN cDNA 1810014G04  
gene  
90 Q96MG8 (Q96MG8) Hypothetical protein FLJ32390  
90 Q96CB9 (Q96CB9) Similar to RIKEN cDNA 2810405F18  
gene  
90 Q8WV35 (Q8WV35) Hypothetical protein  
90 Q8TE79 (Q8TE79) Hypothetical protein FLJ23841  
90 Q8NG19 (Q8NG19) Multi-functional protein MFP  
90 O95669 (O95669) 1C7f  
90 O95667 (O95667) 1C7e  
90 O14932 (O14932) 1C7 precursor (Natural killer  
cell receptor)  
90 O14931 (O14931) 1C7 precursor  
90 O14930 (O14930) 1C7 precursor (1C7 protein)  
85 YPL2\_HUMAN (Q96QA6) Yippee-like protein 2  
(DiGeorge syndrome-related protein FKSG4)  
85 YPL1\_HUMAN (O60688) Yippee-like protein 1  
(DiGeorge syndrome-related protein FKSG3)  
85 Q9UKA0 (Q9UKA0) F-box protein FBL9 (Fragment)  
85 Q9HC13 (Q9HC13) MDS024  
85 Q9BRZ8 (Q9BRZ8) Hypothetical protein  
85 O95333 (O95333) Hypothetical protein (Fragment)  
76 T9S1\_HUMAN (O15321) Transmembrane 9 superfamily  
protein member 1 precursor (hMP70)  
76 Q9Y4T0 (Q9Y4T0) Hypothetical protein (Fragment)  
76 Q9Y3M6 (Q9Y3M6) Hypothetical protein  
76 Q9Y384 (Q9Y384) CGI-75 protein  
76 Q9UGK9 (Q9UGK9) Deafness locus associated  
putative guanine nucleotide exchange factor  
76 Q9NZY6 (Q9NZY6) HSPC049  
76 Q9NW70 (Q9NW70) Hypothetical protein  
76 Q9NSP4 (Q9NSP4) Hypothetical protein  
76 Q9H9B6 (Q9H9B6) Hypothetical protein FLJ12873  
76 Q9H5G8 (Q9H5G8) Hypothetical protein FLJ23451  
76 Q9BV44 (Q9BV44) Similar to gene trap ROSA 26  
antisense, Philippe Soriano (DKFZP434F091  
protein)  
76 Q96HT9 (Q96HT9) Hypothetical protein (Williams-  
Beuren syndrome critical region protein 20 copy  
A)  
76 Q96FX7 (Q96FX7) Similar to CG14544 gene product  
76 Q96FI8 (Q96FI8) Hypothetical protein  
76 Q96AE5 (Q96AE5) HSPC049 protein  
76 Q8WXX1 (Q8WXX1) Hypothetical protein

76 Q8WVM0 (Q8WVM0) Hypothetical protein  
 76 Q8TDR6 (Q8TDR6) Cytoplasmic protein Ndr1  
 76 Q8N7U7 (Q8N7U7) Hypothetical protein FLJ40321  
 76 Q8N7Q9 (Q8N7Q9) Hypothetical protein FLJ40452  
 76 Q8N2N9 (Q8N2N9) Hypothetical protein FLJ90089  
 76 Q8N1T9 (Q8N1T9) Hypothetical protein FLJ37562  
 76 PC01\_HUMAN (Q15113) Procollagen C-proteinase  
 enhancer protein precursor (PCPE) (Type I  
 procollagen COOH-terminal proteinase enhancer)  
 (Type 1 procollagen C-proteinase enhancer  
 protein)  
 76 PCL1\_HUMAN (Q9UHG3) Prenylcysteine lyase  
 precursor (EC 4.4.1.18)  
 76 O94940 (O94940) Hypothetical protein KIAA0859  
 (Fragment)  
 76 O15032 (O15032) Hypothetical protein KIAA0316  
 (Fragment)  
 76 NF3L\_HUMAN (Q9GZT8) NIF3-like protein 1  
 (Amyotrophic lateral sclerosis 2 chromosomal  
 region candidate gene protein 1) (My018 protein)  
 (MDS015)  
 76 NDR2\_HUMAN (Q9UN36) NDRG2 protein (Syld709613  
 protein)  
 76 FBRL\_HUMAN (P22087) Fibrillarin (34 kDa nucleolar  
 scleroderma antigen)  
 76 CV03\_HUMAN (Q9Y3P4) Protein C22orf3  
 75 Q9P2F4 (Q9P2F4) Hypothetical protein KIAA1393  
 (Fragment)  
 75 Q8WVP3 (Q8WVP3) Similar to RIKEN cDNA 2410075D05  
 gene  
 75 Q8NF25 (Q8NF25) FLJ00377 protein (Fragment)  
 74 Q9C0C4 (Q9C0C4) Hypothetical protein KIAA1739  
 (Fragment)  
 74 Q9BQD7 (Q9BQD7) Similar to FBan0003337  
 74 Q96SZ0 (Q96SZ0) Hypothetical protein FLJ14557  
 74 Q96NM0 (Q96NM0) Hypothetical protein FLJ30596  
 74 O95671 (O95671) ASMTL protein  
 72 FSL1\_HUMAN (Q12841) Follistatin-related protein 1  
 precursor (Follistatin-like 1)  
 71 VP16\_HUMAN (Q9H269) Vacuolar protein sorting 16  
 (hVPS16)  
 71 TRBP\_HUMAN (Q15633) TAR RNA-binding protein 2  
 (Trans-activation responsive RNA-binding protein)  
 71 SM4B\_HUMAN (Q9NPR2) Semaphorin 4B (Fragment)  
 71 Q9Y6Z3 (Q9Y6Z3) HGC6.1.2 protein  
 71 Q9NZ80 (Q9NZ80) Uncharacterized bone marrow  
 protein BM042  
 71 Q9H1B7 (Q9H1B7) Polyglutamine-containing protein  
 71 Q9BRY2 (Q9BRY2) Hypothetical protein  
 71 Q9BQR1 (Q9BQR1) Transcription factor SP3  
 (Fragment)  
 71 Q96RL8 (Q96RL8) NOGO-interacting mitochondrial



protein

71 Q96PI7 (Q96PI7) Apoptosis-inhibitor-like protein

71 Q96M70 (Q96M70) Hypothetical protein FLJ32785

71 Q96BT2 (Q96BT2) Similar to actin-related protein 3-beta

71 Q8WWV3 (Q8WWV3) NOGO-interacting mitochondrial protein

71 Q8TAD8 (Q8TAD8) Smad nuclear interacting protein (Smad nuclear-interacting protein 1)

71 Q8NBC4 (Q8NBC4) Hypothetical protein FLJ33706

71 Q8NAD4 (Q8NAD4) Hypothetical protein FLJ35527

71 Q8N5C2 (Q8N5C2) Similar to elongator protein 2

71 Q8N3B0 (Q8N3B0) Hypothetical protein (Fragment)

71 O60486 (O60486) VESPR

71 O43339 (O43339) R28830\_1

71 NDR1\_HUMAN (Q92597) NDRG1 protein (N-myc downstream regulated gene 1 protein) (Differentiation-related gene 1 protein) (DRG1) (Reducing agents and tunicamycin-responsive protein) (RTP) (Nickel-specific induction protein Cap43) (Rit42)

71 NCO4\_HUMAN (Q13772) Nuclear receptor coactivator 4 (NCoA-4) (70 kDa androgen receptor coactivator) (70 kDa AR-activator) (Ret-activating protein ELE1)

71 DADR\_HUMAN (P21728) D(1A) dopamine receptor

71 CO4\_HUMAN (P01028) Complement C4 precursor [Contains: C4A anaphylatoxin]

69 Q9UMK2 (Q9UMK2) Fibronectin (Fragment)

69 Q9UJJ5 (Q9UJJ5) C321D2.3 (Novel protein) (Fragment)

69 Q9NYR8 (Q9NYR8) Photoreceptor outer segment all-trans retinol dehydrogenase

69 Q9NV81 (Q9NV81) Hypothetical protein FLJ10879

69 Q9NT49 (Q9NT49) Hypothetical protein (Fragment)

69 Q9H9N0 (Q9H9N0) Hypothetical protein FLJ12647

69 Q9C0B8 (Q9C0B8) Hypothetical protein KIAA1745 (Fragment)

69 Q96RZ0 (Q96RZ0) Hypothetical protein

69 Q96FF7 (Q96FF7) Hypothetical protein (Fragment)

69 Q8WTX0 (Q8WTX0) Hypothetical protein

69 Q8TE01 (Q8TE01) DERP12 (Dermal papilla derived protein 12)

69 Q8N9A8 (Q8N9A8) Hypothetical protein FLJ38101

69 Q8N7C5 (Q8N7C5) Hypothetical protein FLJ25795

69 Q8N244 (Q8N244) Hypothetical protein FLJ33962

69 NDR3\_HUMAN (Q9UGV2) NDRG3 protein

67 Q9P1U1 (Q9P1U1) Actin-related protein 3-beta

67 Q9BPY3 (Q9BPY3) Similar to hypothetical protein FLJ20635

62 Q8WZ83 (Q8WZ83) Olfactory receptor-like protein

(Fragment)

62 Q8TCP4 (Q8TCP4) Hypothetical protein (Fragment)

61 Q9H0G1 (Q9H0G1) Hypothetical protein

61 Q9BZQ1 (Q9BZQ1) Clorf25 (Hypothetical protein FLJ90512)

61 Q96T53 (Q96T53) FKSG89

61 Q8NE06 (Q8NE06) Hypothetical protein

61 NRTR\_HUMAN (O00451) Neurturin receptor alpha precursor (NTNR-alpha) (NRTNR-alpha) (TGF-beta related neurotrophic factor receptor 2) (GDNF receptor beta) (GDNFR-beta) (RET ligand 2) (GFR-alpha 2)

61 CBX6\_HUMAN (O95503) Chromobox protein homolog 6

61 ARP3\_HUMAN (P32391) Actin-like protein 3 (Actin-related protein 3) (Actin-2)

61 6PGL\_HUMAN (O95336) 6-phosphogluconolactonase (EC 3.1.1.31) (6PGL)

60 YG49\_HUMAN (Q9BY77) Hypothetical protein KIAA1649

60 SMS\_HUMAN (P01166) Somatostatin precursor [Contains: Somatostatin-28; Somatostatin-14]

60 Q9NUP7 (Q9NUP7) Hypothetical protein FLJ11219

60 Q9H9M2 (Q9H9M2) Hypothetical protein FLJ12660

60 Q9BXP6 (Q9BXP6) Hypothetical protein

60 Q9BU76 (Q9BU76) Hypothetical protein

60 Q96DI7 (Q96DI7) Hypothetical protein

60 Q8TE06 (Q8TE06) SLTP004

60 Q8TB37 (Q8TB37) Hypothetical protein

60 Q8N4J0 (Q8N4J0) Similar to RIKEN cDNA 2410127L17 gene

60 Q8N2M4 (Q8N2M4) Hypothetical protein FLJ90119

60 Q8N1W4 (Q8N1W4) Hypothetical protein FLJ37387

60 PSD1\_HUMAN (Q99460) 26S proteasome non-ATPase regulatory subunit 1 (26S proteasome regulatory subunit S1) (26S proteasome subunit p112)

60 PGC2\_HUMAN (O15173) Membrane associated progesterone receptor component 2 (Progesterone membrane binding protein) (Steroid receptor protein DG6)

60 O95320 (O95320) U5 snRNP-specific 40 kDa protein

60 CLS2\_HUMAN (Q9H4D0) Calsyntenin-2 precursor

60 C24B\_HUMAN (P04839) Cytochrome B-245 heavy chain (P22 phagocyte B-cytochrome) (Neutrophil cytochrome B, 91 kDa polypeptide) (CGD91-PHOX) (GP91-PHOX) (Heme binding membrane glycoprotein GP91PHOX) (Cytochrome B(558) beta chain) (Superoxide-generating NADPH oxidase heavy chain subunit)

60 ANGT\_HUMAN (P01019) Angiotensinogen precursor [Contains: Angiotensin I (Ang I); Angiotensin II (Ang II); Angiotensin III (Ang III) (Des-Asp[1]-angiotensin II)]

|              |                                                                                                                                                            |
|--------------|------------------------------------------------------------------------------------------------------------------------------------------------------------|
| 57           | TFAM_HUMAN (Q00059) Transcription factor A, mitochondrial precursor (mtTFA) (Mitochondrial transcription factor 1) (MtTF1) (Transcription factor 6-like 2) |
| 57           | Q9ULP9 (Q9ULP9) Hypothetical protein KIAA1171 (Fragment)                                                                                                   |
| 57           | Q9UIK5 (Q9UIK5) TMEFF2 protein precursor (Transmembrane protein TENB2) (TPEF) (Transmembrane protein with EGF-like and TWO follistatin-like domains 2)     |
| 57           | Q96R29 (Q96R29) Olfactory receptor (Fragment)                                                                                                              |
| 57           | Q96R28 (Q96R28) Olfactory receptor (Fragment)                                                                                                              |
| 57           | Q96QR8 (Q96QR8) Pur-beta                                                                                                                                   |
| 57           | Q96AQ2 (Q96AQ2) Hypothetical protein                                                                                                                       |
| 57           | Q8WW14 (Q8WW14) Hypothetical protein                                                                                                                       |
| 57           | Q8TC94 (Q8TC94) Hypothetical protein                                                                                                                       |
| 57           | Q8N2R5 (Q8N2R5) Hypothetical protein FLJ90026                                                                                                              |
| 57           | BMP6_HUMAN (P22004) Bone morphogenetic protein 6 precursor (BMP-6)                                                                                         |
| 56           | Q9BU27 (Q9BU27) Similar to predicted osteoblast protein                                                                                                    |
| 56           | Q96DN2 (Q96DN2) Hypothetical protein FLJ32009                                                                                                              |
| 56           | Q8TF28 (Q8TF28) Hypothetical protein KIAA1974 (Fragment)                                                                                                   |
| 55           | Q9UDC7 (Q9UDC7) P600 homolog                                                                                                                               |
| 54           | Q9NWK6 (Q9NWK6) Hypothetical protein FLJ20772                                                                                                              |
| 54           | Q8NFK1 (Q8NFK1) Connexin 31.3                                                                                                                              |
| 54           | Q8N0U2 (Q8N0U2) Hypothetical gene LOC127421                                                                                                                |
| 53           | Q9P1C9 (Q9P1C9) PRO2561 (Hypothetical protein)                                                                                                             |
| 53           | Q96I58 (Q96I58) Hypothetical protein                                                                                                                       |
| 53           | Q8N9Z7 (Q8N9Z7) Hypothetical protein FLJ36014                                                                                                              |
| 53           | Q8N7B9 (Q8N7B9) Hypothetical protein FLJ25818                                                                                                              |
| 53           | O00634 (O00634) Netrin-2 like protein                                                                                                                      |
| 53           | FIG1_HUMAN (Q96RQ9) Interleukin-4 induced protein 1 precursor (Fig-1 protein)                                                                              |
| 53           | BCLW_HUMAN (Q92843) Apoptosis regulator Bcl-W (BCL2-like 2 protein)                                                                                        |
| 53           | AS12_HUMAN (Q8WXX4) Ankyrin repeat and SOCS box containing protein 12 (ASB-12)                                                                             |
| 52           | SNXQ_HUMAN (O14559) Sorting nexin 26                                                                                                                       |
| 52           | Q96LL8 (Q96LL8) Hypothetical protein FLJ25390                                                                                                              |
| 51           | Q8N2V9 (Q8N2V9) Hypothetical protein (Fragment)                                                                                                            |
| 51           | Q8N1G2 (Q8N1G2) Hypothetical protein KIAA0082                                                                                                              |
| <b>Mouse</b> |                                                                                                                                                            |
| 100          | Q9DD20 (Q9DD20) 0610006F02Rik protein (RIKEN cDNA 0610006F02 gene)                                                                                         |
| 100          | Q9DCT4 (Q9DCT4) 1110003N24Rik protein                                                                                                                      |
| 100          | Q9DCS2 (Q9DCS2) 0610011F06Rik protein                                                                                                                      |
| 100          | Q9DAX6 (Q9DAX6) 1600013P15Rik protein (RIKEN cDNA 1600013P15 gene)                                                                                         |
| 100          | Q9D9Q9 (Q9D9Q9) 2310045H08Rik protein                                                                                                                      |

Automated Identification of Putative Methyltransferases

100 Q9D853 (Q9D853) 2010208K18Rik protein  
100 Q9D7S5 (Q9D7S5) 2210414H16Rik protein  
100 Q9D5F1 (Q9D5F1) 2610002P10Rik protein  
100 Q9D1L3 (Q9D1L3) 1110003N24Rik protein  
100 Q9D0L8 (Q9D0L8) 2610002P10Rik protein (RIKEN cDNA  
2610002P10 gene)  
100 Q9CZ25 (Q9CZ25) 2810410A08Rik protein  
100 Q9CZ09 (Q9CZ09) 2810422O20Rik protein  
100 Q9CX58 (Q9CX58) 6720434D09Rik protein  
100 Q9CST4 (Q9CST4) 5830445C04Rik protein (Fragment)  
100 Q9CS89 (Q9CS89) 5730409G15Rik protein (Fragment)  
100 Q9CPY0 (Q9CPY0) 2310037B18Rik protein  
100 Q99LP4 (Q99LP4) Hypothetical 25.8 kDa protein  
100 Q99KI7 (Q99KI7) Similar to hypothetical protein  
FLJ13984  
100 Q99KC3 (Q99KC3) Hypothetical 46.8 kDa protein  
100 Q922K7 (Q922K7) Similar to nucleolar protein 1  
(120kD)  
100 Q8R1C6 (Q8R1C6) Hypothetical 43.6 kDa protein  
100 Q8K1A0 (Q8K1A0) Similar to HSPC133 protein  
100 P70222 (P70222) Protein HTF9C (ORF2 product)  
95 YPL3\_MOUSE (Q9D0U3) Yippee-like protein 3  
95 YPL2\_MOUSE (Q9CQB6) Yippee-like protein 2  
95 U183\_MOUSE (Q922R1) UPF0183 protein  
95 Q9QY68 (Q9QY68) Hematopoietic zinc finger protein  
95 Q9D8V1 (Q9D8V1) 1810030M08Rik protein  
95 Q9D4U5 (Q9D4U5) 4930556P03Rik protein  
95 Q9D445 (Q9D445) 4933414E04Rik protein  
95 Q9CZ57 (Q9CZ57) 2810405F18Rik protein (RIKEN cDNA  
2810405F18 gene)  
95 Q9CTV2 (Q9CTV2) 4933434L15Rik protein (Fragment)  
95 Q9CQL0 (Q9CQL0) 2310038H17Rik protein  
95 Q91YP1 (Q91YP1) Similar to RIKEN cDNA 4930556P03  
gene  
95 Q8R2U4 (Q8R2U4) Similar to AD-003 protein  
95 IRG1\_MOUSE (P54987) Immune-responsive protein 1  
(Fragment)  
90 Q9D2Q2 (Q9D2Q2) 2310079F23Rik protein  
83 Q9D8I4 (Q9D8I4) Adult male small intestine cDNA,  
RIKEN full-length enriched library,  
clone:2010001F03, full insert sequence  
81 YPL1\_MOUSE (Q9ESC7) Yippee-like protein 1 (DGL-1)  
(Mdgl-1)  
81 Q9D146 (Q9D146) 1110030G24Rik protein  
78 Q9D928 (Q9D928) 1810009K13Rik protein  
78 Q9D407 (Q9D407) 4933424L15Rik protein  
78 GLI3\_MOUSE (Q61602) Zinc finger protein GLI3  
75 Q9DA95 (Q9DA95) 1700016N17Rik protein  
75 Q9D8Q9 (Q9D8Q9) 1810009K13Rik protein  
75 Q9CWD5 (Q9CWD5) 2410197A17Rik protein

73 Q9CZT5 (Q9CZT5) 2610528G05Rik protein  
 73 Q8R2G5 (Q8R2G5) Slit-like 2 protein precursor  
 69 Q9D900 (Q9D900) 1810014G04Rik protein  
 69 Q9D1Z3 (Q9D1Z3) A930016P21Rik protein  
 69 Q9D1J5 (Q9D1J5) 1110005A03Rik protein  
 69 Q9D0C4 (Q9D0C4) 2610027O18Rik protein (RIKEN cDNA  
 2610027O18 gene)  
 69 Q9CXI0 (Q9CXI0) 1810014G04Rik protein  
 69 Q9CUB4 (Q9CUB4) 4933430B08Rik protein (Fragment)  
 69 Q9CTQ5 (Q9CTQ5) A930005C09Rik protein (Fragment)  
 69 Q9CTE4 (Q9CTE4) 1110020G09Rik protein (Fragment)  
 69 Q9CSP6 (Q9CSP6) 2700018L24Rik protein (Fragment)  
 69 Q9CQF9 (Q9CQF9) 1200015P13Rik protein (RIKEN cDNA  
 1200015P13 gene)  
 69 Q925H5 (Q925H5) Keratin-associated protein 16.6  
 (Fragment)  
 69 Q8R2Z2 (Q8R2Z2) RIKEN cDNA 1110005A03 gene  
 69 Q8R0W6 (Q8R0W6) Hypothetical 24.9 kDa protein  
 69 Q03317 (Q03317) Transcription factor S-II-related  
 proteins  
 68 P97770 (P97770) Hypothetical 56.4 kDa protein  
 (ROSA26AS)  
 66 Q9CVD2 (Q9CVD2) 2210008M02Rik protein (Fragment)  
 66 Q99L58 (Q99L58) Hypothetical 34.3 kDa protein  
 64 Q9CWH5 (Q9CWH5) 2410075D05Rik protein  
 62 Q9JJW6 (Q9JJW6) RNA and export factor binding  
 protein 2-I  
 62 Q9EQH8 (Q9EQH8) Nedd4 WW domain-binding protein 5  
 (Fragment)  
 62 Q9CXA7 (Q9CXA7) 8430422M09Rik protein  
 59 Q9DBE9 (Q9DBE9) Epcs3 protein  
 59 Q921I7 (Q921I7) Similar to ectoplacental cone,  
 invasive trophoblast giant cells, extraembryonic  
 ectoderm and chorion sequence 3  
 59 Q91YR5 (Q91YR5) Hypothetical 78.8 kDa protein  
 59 Q8VH01 (Q8VH01) Olfactory receptor MOR19-1  
 59 Q8K4F6 (Q8K4F6) Williams-Beuren syndrome critical  
 region protein 20  
 59 Q8JZM0 (Q8JZM0) Hypothetical protein  
 (Transcription factor b1)  
 59 NF3L\_MOUSE (Q9EQ80) NIF3-like protein 1  
 59 NDR2\_MOUSE (Q9QYG0) NDRG2 protein (Ndr2 protein)  
 56 TR18\_MOUSE (O35714) Tumor necrosis factor  
 receptor superfamily member 18 precursor  
 (Glucocorticoid-induced TNFR-related protein)  
 56 Q9D8X6 (Q9D8X6) 1810022C23Rik protein (RIKEN cDNA  
 1810022C23 gene)  
 55 Q9QZC2 (Q9QZC2) Receptor for viral-encoded  
 semaphorin protein  
 55 Q9JM62 (Q9JM62) Polyposis locus protein 1-like 1  
 (TB2 protein-like 1)  
 55 Q99LX5 (Q99LX5) Hypothetical 29.3 kDa protein

55 Q925H6 (Q925H6) Keratin-associated protein 16.5  
 55 FSL1\_MOUSE (Q62356) Follistatin-related protein 1 precursor (Follistatin-like 1) (TGF-beta-inducible protein TSC-36)  
 53 Q9DA18 (Q9DA18) 1700023B23Rik protein  
 51 Q8R0T6 (Q8R0T6) Hypothetical 51.6 kDa protein (Fragment)  
 51 NDR1\_MOUSE (Q62433) NDRG1 protein (N-myc downstream regulated gene 1 protein) (Protein Ndr1)

***S. cerevisiae***

100YNJ2\_YEAST (P53934) Hypothetical 45.5 kDa protein in YPT53-RHO2 intergenic region  
 100YNC4\_YEAST (P53970) Hypothetical 27.7 kDa protein in UME3-HDA1 intergenic region  
 100YMB4\_YEAST (P49957) Hypothetical 32.4 kDa protein in TAF40-ERV25 intergenic region  
 100YJ99\_YEAST (P47163) Hypothetical 39.0 kDa protein in ZMS1-MNS1 intergenic region  
 100YIG4\_YEAST (P40516) Hypothetical 28.7 kDa protein in RNR3-ARC15 intergenic region  
 100YHN0\_YEAST (P38793) Hypothetical 56.5 kDa protein in DYS1-PCL5 intergenic region  
 100YH09\_YEAST (P38892) Hypothetical 33.8 kDa protein in TWT1-FL05 intergenic region  
 100YE05\_YEAST (P32643) Hypothetical 34.8 kDa protein in RAD24-BMH1 intergenic region  
 100YB9P\_YEAST (P38347) Hypothetical 48.0 kDa protein in MRPL37-RIF1 intergenic region  
 100Q12052 (Q12052) P2573 protein (ORF YPL157W)  
 100Q12009 (Q12009) ORF D1075  
 100Q06668 (Q06668) SIMILARITY to E. COLI hypothetical 28.1 kDa protein in UDP-RFAH region  
 100Q03920 (Q03920) Hypothetical 25.0 kDa protein  
 100Q02733 (Q02733) LPB14P  
 100ABPX\_YEAST (Q08641) Actin-binding protein ABP140  
 91Q12463 (Q12463) Chromosome XV reading frame ORF YOL124C  
 91NOP2\_YEAST (P40991) Nucleolar protein NOP2  
 91MTF1\_YEAST (P14908) Mitochondrial replication protein MTF1 (Mitochondrial transcription factor MTTFB) (RF1023) (Mitochondrial specificity factor)  
 90YIL0\_YEAST (P40481) Hypothetical 42.5 kDa protein in COX5B-PFK26 intergenic region  
 86YNG3\_YEAST (P53944) Hypothetical 35.9 kDa protein in MAS5-GCD10 intergenic region  
 81YB9H\_YEAST (P38340) Hypothetical 26.1 kDa protein in POP4-SHM1 intergenic region  
 72Q04081 (Q04081) D9461.21P  
 68YMA5\_YEAST (Q04235) Hypothetical 52.7 kDa protein in PDR4-GLO1 intergenic region  
 68Q03305 (Q03305) D8035.9P

62YGA4\_YEAST (P53196) Hypothetical 46.4 kDa Trp-Asp repeats containing protein in PMC1-TFG2 intergenic region  
62TBP6\_YEAST (P40328) Probable 26S protease subunit YTA6 (TAT-binding homolog 6)  
62FBRL\_YEAST (P15646) Fibrillarin (Nucleolar protein 1)  
54YHX6\_YEAST (P38866) Hypothetical 42.4 kDa protein in CTR2-STB5 intergenic region  
54Q12291 (Q12291) ORF YLR063W  
54NPR1\_YEAST (P22211) Nitrogen permease reactivator protein (EC 2.7.1.-)  
54FRE7\_YEAST (Q12333) Ferric reductase transmembrane component 7 (EC 1.16.1.7) (Ferric-chelate reductase 7)  
45YD61\_YEAST (P38961) Hypothetical 47.2 kDa protein in STN1-AFR1 intergenic region  
45Q05874 (Q05874) Chromosome XII COSMID 8003  
39YN91\_YEAST (P53748) Hypothetical 35.7 kDa protein in BIO3-HXT17 intergenic region  
39YIR0\_YEAST (P40441) Hypothetical 50.8 kDa protein in SDL1 5' region  
39RN15\_YEAST (P25299) mRNA 3'-end processing protein RNA15  
39Q12090 (Q12090) Similar to S. POMBE hypothetical protein C22G7.04P (YLR107WP)  
34YM79\_YEAST (Q04018) Hypothetical 37.4 kDa protein in ZRC1-FAA4 intergenic region  
32YN8H\_YEAST (P53729) Hypothetical 48.1 kDa protein in SEC12-SSK2 intergenic region  
32YKP5\_YEAST (P36056) Hypothetical 72.2 kDa protein in RPS27A-GPM1 intergenic region  
32RA51\_YEAST (P25454) DNA repair protein RAD51  
28YAE6\_YEAST (P39724) Hypothetical 13.4 kDa protein in ACS1-GCV3 intergenic region  
28Q06147 (Q06147) Chromosome XII COSMID 8479  
27YM29\_YEAST (Q03792) Hypothetical 83.1 kDa protein in IMP1-HLJ1 intergenic region  
27Q08282 (Q08282) Chromosome XV reading frame ORF YQL141W  
27Q02648 (Q02648) LPB1P  
26Q96VH5 (Q96VH5) Hypothetical 10.4 kDa protein  
25Q07410 (Q07410) ORF YDL062W
